# Supplementary material for: New Insights into the Variation and Admixture of the Cave-Dwelling Spider Trogloneta yunnanensis in South China Karst
Source: MDPI journal article supplement (doi:10.3390/ani13071244), 2023-04-03
Supplement: s1 [file s1]

**Table S1.** Primers used in this study

| Locus | Primer |             | Sequence 5'→3'<br>(forward and reverse) | Reference             | PCR<br>reaction       |
|-------|--------|-------------|-----------------------------------------|-----------------------|-----------------------|
| ITS-2 | F      | ITS-5.8s    | GGGACGATGAAGAACGGAGC                    | (White et al. 1990)   | 94°C 45s              |
|       | R      | ITS-28s     | TCCTCCGCTTATTGATATGC                    |                       | 48°C 1min<br>72°C 60s |
| 28SD2 | F      | 28sa        | GACCCGTCTTGAACACGGA                     | (Rix et al. 2008)     | 94°C 30s              |
|       | R      | LSUR        | GCTACTACCACCAAGATCTGCA                  |                       | 55°C 30s<br>72°C 30s  |
| H3    | F      | H3nf        | ATGGCTCGTACCAAGCAGAC                    | (Colgan et al. 1998)  | 94°C 30s              |
|       | R      | H3nr        | ATRTCCTTGGGCATGATTGTTAC                 |                       | 50°C 45s<br>72°C 45s  |
| cox1  | F      | LCO1490     | GGTCAACAAATCATAAAGATATTGG               | (Folmer et al. 1994)  | 94°C 30s              |
|       | R      | HCO2198     | TAAACTTCAGGGTGACCAAAAAATCA              |                       | 49°C 30s<br>72°C 30s  |
| 16S   | F      | 16sb2_12864 | CTCCGGTTTGAAGTCAGATCA                   | (Hormiga et al. 2003) | 94°C 30s              |
|       | R      | LR-J-13360  | GTAAGGCCTGCTCAATGA                      |                       | 50°C 30s<br>72°C 45s  |
|       |        |             |                                         | (Yan 2018)            |                       |

**Table S2.** Sequences information

| Samples                      |                 | GenBank accession number |          |          |          |          |
|------------------------------|-----------------|--------------------------|----------|----------|----------|----------|
| Species                      | individual code | <i>cox1</i>              | 16S      | ITS-2    | 28S      | H3       |
| <i>Trogloneta yunnanense</i> | GN-1            | MZ577427                 | MZ612904 | OK513497 | MZ613029 | MZ603566 |
|                              | GN-2            | NA                       | MZ612905 | NA       | MZ613030 | MZ603567 |
|                              | GN-3            | MZ577428                 | MZ612906 | OK513498 | MZ613031 | MZ603568 |
|                              | GN-4            | MZ577429                 | MZ612907 | OK513499 | MZ613032 | MZ603569 |
|                              | GN-5            | MZ577430                 | MZ612908 | OK513500 | MZ613033 | MZ603570 |
|                              | GN-6            | MZ577431                 | MZ612909 | OK513501 | MZ613034 | MZ603571 |
|                              | GN-7            | MZ577432                 | MZ612910 | OK513502 | MZ613035 | MZ603572 |
|                              | GN-8            | MZ577433                 | MZ612911 | OK513503 | MZ613057 | MZ603595 |
|                              | GN-9            | MZ577434                 | MZ612912 | OK513504 | MZ613063 | MZ603601 |
|                              | GN-10           | MZ577435                 | MZ612913 | OK513505 | MZ613058 | MZ603596 |
|                              | GN-11           | MZ577436                 | MZ612914 | OK513506 | MZ613059 | MZ603597 |
|                              | GN-12           | MZ577437                 | MZ612915 | OK513507 | MZ613060 | MZ603598 |
|                              | GN-13           | MZ577438                 | MZ612916 | OK513508 | MZ613061 | MZ603599 |
|                              | GN-14           | MZ577439                 | MZ612917 | OK513509 | MZ613062 | MZ603600 |
|                              | YLD-1           | MZ577392                 | MZ612869 | OK513485 | MZ613024 | MZ603560 |

---

|        |          |          |          |          |          |
|--------|----------|----------|----------|----------|----------|
| YLD-2  | MZ577393 | MZ612870 | OK513486 | MZ613025 | MZ603561 |
| YLD-3  | MZ577394 | MZ612871 | OK513487 | MZ613026 | MZ603562 |
| YLD-4  | MZ577395 | MZ612872 | OK513488 | MZ613027 | MZ603563 |
| YLD-5  | MZ577396 | MZ612873 | OK513489 | MZ613028 | MZ603564 |
| YLD-6  | MZ577397 | MZ612874 | OK513490 | MZ613024 | MZ603565 |
| YLD-7  | MZ577398 | MZ612875 | OK513491 | MZ613051 | MZ603589 |
| YLD-8  | MZ577399 | MZ612876 | OK513492 | MZ613052 | MZ603590 |
| YLD-9  | MZ577400 | MZ612877 | OK513493 | MZ613053 | MZ603591 |
| YLD-10 | MZ577401 | MZ612878 | OK513494 | MZ613054 | MZ603592 |
| YLD-11 | MZ577402 | MZ612879 | OK513495 | MZ613055 | MZ603593 |
| YLD-12 | MZ577403 | MZ612880 | OK513496 | MZ613056 | MZ603594 |
| QX-1   | MZ577440 | MZ612918 | OK513461 | MZ613012 | MZ603548 |
| QX-2   | MZ577441 | MZ612919 | OK513462 | MZ613013 | MZ603549 |
| QX-3   | MZ577442 | MZ612920 | OK513463 | MZ613014 | MZ603550 |
| QX-4   | MZ577443 | MZ612921 | OK513464 | MZ613015 | MZ603551 |
| QX-5   | MZ577444 | MZ612922 | OK513465 | MZ613016 | MZ603552 |
| QX-6   | MZ577445 | MZ612923 | OK513466 | MZ613045 | MZ603583 |
| QX-7   | MZ577446 | MZ612924 | OK513467 | MZ613046 | MZ603584 |
| QX-8   | MZ577447 | MZ612925 | OK513468 | MZ613047 | MZ603585 |
| QX-9   | MZ577448 | MZ612926 | OK513469 | MZ613048 | MZ603586 |
| QX-10  | MZ577449 | MZ612927 | OK513470 | MZ613049 | MZ603587 |
| QX-11  | MZ577450 | MZ612928 | OK513471 | MZ613050 | MZ603588 |
| SLD-1  | MZ577404 | MZ612881 | OK513472 | MZ613017 | MZ603553 |
| SLD-2  | MZ577405 | MZ612882 | OK513473 | MZ613018 | MZ603554 |
| SLD-3  | MZ577406 | MZ612883 | OK513474 | MZ613019 | MZ603555 |
| SLD-4  | MZ577407 | MZ612884 | OK513475 | MZ613020 | MZ603556 |
| SLD-5  | MZ577408 | MZ612885 | OK513476 | MZ613021 | MZ603557 |
| SLD-6  | MZ577409 | MZ612886 | OK513477 | MZ613022 | MZ603558 |
| SLD-7  | MZ577410 | MZ612887 | OK513478 | MZ613023 | MZ603559 |
| SLD-8  | MZ577411 | MZ612888 | OK513479 | MZ613039 | MZ603577 |
| SLD-9  | MZ577412 | MZ612889 | OK513480 | MZ613040 | MZ603578 |
| SLD-10 | MZ577413 | MZ612890 | OK513481 | MZ613041 | MZ603579 |
| SLD-11 | MZ577414 | MZ612891 | OK513482 | MZ613042 | MZ603580 |
| SLD-12 | MZ577415 | MZ612892 | OK513483 | MZ613043 | MZ603581 |
| SLD-13 | MZ577416 | MZ612893 | OK513484 | MZ613044 | MZ603582 |
| XR-1   | MZ577379 | MZ612856 | OK513448 | MZ613005 | MZ603541 |
| XR-2   | MZ577380 | MZ612857 | OK513449 | MZ613006 | MZ603542 |
| XR-3   | MZ577381 | MZ612858 | OK513450 | MZ613007 | MZ603543 |
| XR-4   | MZ577382 | MZ612859 | OK513451 | MZ613008 | MZ603544 |
| XR-5   | MZ577383 | MZ612860 | OK513452 | MZ613009 | MZ603545 |
| XR-6   | MZ577384 | MZ612861 | OK513453 | MZ613010 | MZ603546 |
| XR-7   | MZ577385 | MZ612862 | OK513454 | MZ613011 | MZ603547 |

---

|                           |       |          |          |          |          |          |
|---------------------------|-------|----------|----------|----------|----------|----------|
|                           | XR-8  | MZ577386 | MZ612863 | OK513455 | MZ613065 | MZ603603 |
|                           | XR-9  | MZ577387 | MZ612864 | OK513456 | MZ613066 | MZ603604 |
|                           | XR-10 | MZ577388 | MZ612865 | OK513457 | MZ613067 | MZ603605 |
|                           | XR-11 | MZ577389 | MZ612866 | OK513458 | MZ613068 | MZ603606 |
|                           | XR-12 | MZ577390 | MZ612867 | OK513459 | MZ613069 | MZ603607 |
|                           | XR-13 | MZ577391 | MZ612868 | OK513460 | MZ613064 | MZ603602 |
|                           | BY-1  | MZ577417 | MZ612894 | OK513510 | MZ613036 | MZ603573 |
|                           | BY-2  | MZ577418 | MZ612895 | OK513511 | NA       | MZ603574 |
|                           | BY-3  | MZ577419 | MZ612896 | OK513512 | MZ613037 | MZ603575 |
|                           | BY-4  | MZ577420 | MZ612897 | OK513513 | MZ613038 | MZ603576 |
|                           | BY-5  | MZ577421 | MZ612898 | OK513514 | MZ613070 | MZ603608 |
|                           | BY-6  | MZ577422 | MZ612899 | OK513515 | MZ613071 | MZ603609 |
|                           | BY-7  | MZ577423 | MZ612900 | OK513516 | MZ613072 | MZ603610 |
|                           | BY-8  | MZ577424 | MZ612901 | OK513517 | MZ613073 | MZ603611 |
|                           | BY-9  | MZ577425 | MZ612902 | OK513518 | MZ613074 | MZ603612 |
|                           | BY-10 | MZ577426 | MZ612903 | OK513519 | MZ613075 | MZ603613 |
| <i>Trogloneta yuensis</i> | XX52f | MZ584802 | MZ612929 | NA       | MZ613076 | MZ603614 |
|                           | XX52m | MZ584803 | MZ612930 | NA       | MZ613077 | MZ603615 |

**Table S3.** Best-fit models for genes

| locus       | Mrbayes | BEAST   | IQTREE            |
|-------------|---------|---------|-------------------|
| <i>cox1</i> | GTR+I+G | HKY+I+G | TIM3 + F + I + G4 |
| 16S         | GTR+I+G | HKY+I+G | TIM3 + F + I + G4 |
| H3          | GTR+G   | HKY+I   | TIM + F + G4      |
| 28S         | HKY+G   | HKY+I   | HKY + F           |
| ITS-2       | GTR+G   | HKY+I   | TIM + F + G4      |

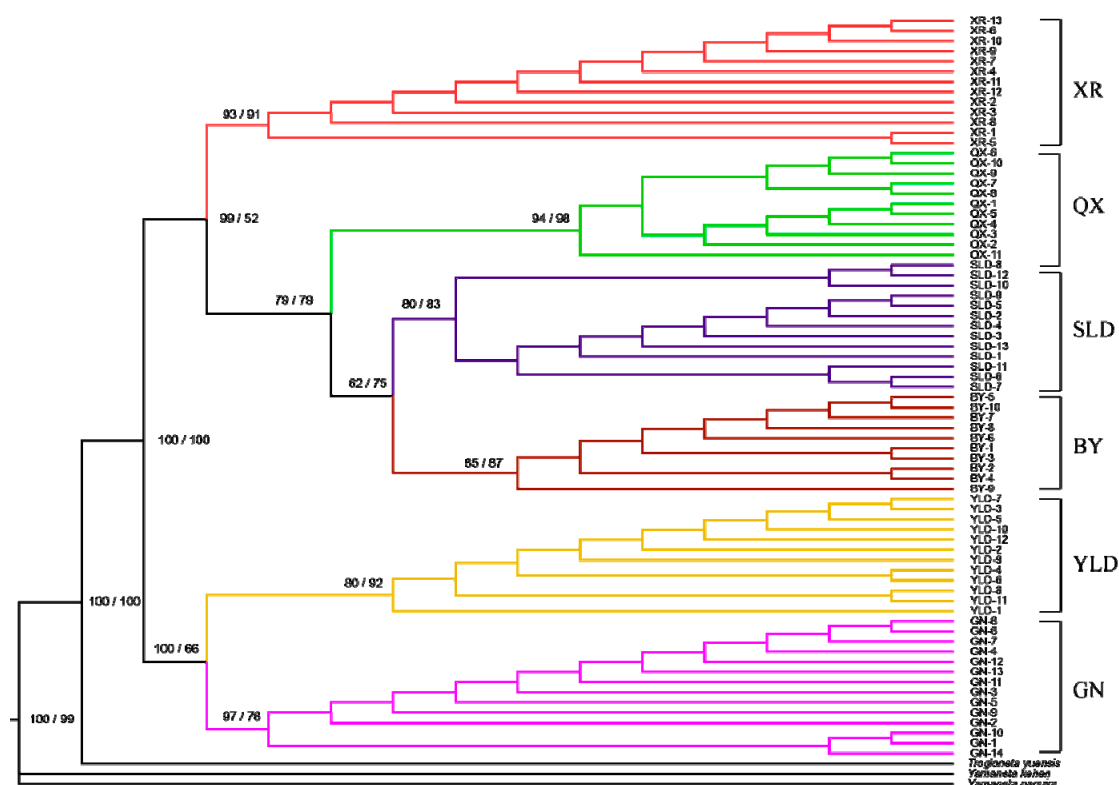

Figure S1. Concatenated gene tree constructed in IQ-TREE. Colors of branches were same as BI tree. Bootstrap supports (right) and SH-aLRT (left) values were provide beside nodes.

## Reference

- Colgan DJ, McLauchlan A, Wilson GDF, Livingston SP, Edgecombe GD, Macaranas J, Cassis G, Gray MR. 1998. Histone H3 and U2 snRNA DNA sequences and arthropod molecular evolution. *Australian Journal of Zoology*, 46(5): 419.
- Folmer O, Black M, Hoeh W, Lutz R, Vrijenhoek R. 1994. DNA primers for amplification of mitochondrial cytochrome C oxidase subunit I from diverse metazoan invertebrates. *Molecular Marine Biology and Biotechnology*, 3(5): 294–299.
- Hormiga G, Arnedo M, Gillespie RG. 2003. Speciation on a Conveyor Belt: Sequential Colonization of the Hawaiian Islands by Orsonwelles Spiders (Araneae, Linyphiidae). *Systematic Biology*, 52(1): 70–88.
- Rix MG, Harvey MS, Roberts JD. 2008. Molecular phylogenetics of the spider family Micropholcommatidae (Arachnida: Araneae) using nuclear rRNA genes (18S and 28S). *Molecular phylogenetics and evolution*, 46, 1031–1048.
- White TJ, Bruns T, Lee S, Taylor J. 1990. Amplification and direct sequencing of fungal ribosomal RNA genes for phylogenetics. In: *PCR Protocols: a guide to methods and applications*. New York: Academic Press.
- Yan FH. 2018. Molecular systematics of the Mysmenidae (Arachnida, Araneae) from China. M. S. Thesis, Sichuan University, Chengdu.
